# Supplementary material for: Genetic Prediction of Serum 25-Hydroxyvitamin D, Calcium, and Parathyroid Hormone Levels in Relation to Development of Type 2 Diabetes: A Mendelian Randomization Study
Source: Oxford University Press journal article supplement (doi:10.2337/dc19-1247), 2019-09-23
Supplement: dc191247supplementarydata.pdf [file dc191247supplementarydata.pdf]

**Supplementary Table 1.** Details of studies and datasets used for analyses

ALSPAC indicates The Avon Longitudinal Study of Parents and Children; AGES, Age Gene/Environment Susceptibility Reykjavik Study; ARIC, The Atherosclerosis Risk in Communities Study (ARIC); BPROOF, B-Vitamins for the PRvention Of Osteoporotic Fractures; BLSA, The Baltimore Longitudinal Study of Aging; BMDCS, Bone Mineral Density in Childhood Study; CoLaus, Cohort Lausannoise; CHS, Cardiovascular Health Study; FHS, Framingham Heart Study; GOOD, Gothenburg Osteoporosis and Obesity Determinants; Generation R, The Generation R Study; HABC, Health ABC; LBC1936, Lothian Birth Cohort 1936; MrOS, Osteoporotic Fractures in Men USA; MrOS GBG, Osteoporotic Fractures in Men Gothenburg; MrOS MALMO, Osteoporotic Fractures in Men Malmo; NEO, Netherlands Epidemiology of Obesity; OGP, Ogliastra Genetic Park - Talana Study; ORGCADES,

## SUPPLEMENTARY DATA

Study-II; RSIII, Rotterdam Study-III; RS, The Rotterdam Study; SHIP, Study of Health in Pomerania; TUK, TwinsUK; ULSAM, Uppsala Longitudinal

Study of Adult Men; Indiana, Indiana Sisters Cohort; NESDA, Netherlands Study of Depression and Anxiety; OGP–Talana, Ogliastro Genetic Park–Talana Study; GOOD, Gothenburg Osteoporosis and Obesity Determinants; Amish, Amish Family Osteoporosis Study; MDRD, Modification of Diet in Renal Disease.

# SUPPLEMENTARY DATA

**Supplementary Table 2.** Characteristics of the single-nucleotide polymorphisms associated with serum 25-hydroxyvitamin D and calcium levels and their associations with type 2 diabetes, fasting glucose, fasting insulin,  $\beta$ -cell function and insulin resistance

| Traits  | SNP         | Chr | Nearby gene   | EA | EAF   | Calcium or 25OHD level |        |                         | Type 2 diabetes |          |                        | Fasting Glucose       |       |                        |
|---------|-------------|-----|---------------|----|-------|------------------------|--------|-------------------------|-----------------|----------|------------------------|-----------------------|-------|------------------------|
|         |             |     |               |    |       | beta*                  | se     | P                       | beta†           | se       | P                      | beta‡                 | se    | P                      |
| Calcium | rs1801725   | 3   | CASR          | T  | 0.150 | 0.071                  | 0.004  | 8.90×10 <sup>-86</sup>  | 0.026           | 0.011    | 0.015                  | -0.002                | 0.005 | 0.682                  |
| Calcium | rs1570669   | 20  | CYP24A1       | G  | 0.340 | 0.018                  | 0.003  | 9.10×10 <sup>-12</sup>  | -0.011          | 0.008    | 0.150                  | -0.004                | 0.004 | 0.318                  |
| Calcium | rs1550532   | 2   | DGKD          | C  | 0.310 | 0.018                  | 0.003  | 8.20×10 <sup>-11</sup>  | -0.007          | 0.008    | 0.370                  | 4.00×10 <sup>-4</sup> | 0.004 | 0.920                  |
| Calcium | rs7481584   | 11  | CARS          | G  | 0.700 | 0.018                  | 0.003  | 1.20×10 <sup>-10</sup>  | -0.019          | 0.008    | 0.021                  | 3.00×10 <sup>-4</sup> | 0.004 | 0.947                  |
| Calcium | rs780094    | 2   | GCKR**        | T  | 0.420 | 0.017                  | 0.003  | 1.30×10 <sup>-10</sup>  | -0.068          | 0.008    | 9.20×10 <sup>-19</sup> | -0.026                | 0.004 | 2.49×10 <sup>-12</sup> |
| Calcium | rs7336933   | 13  | DGKH/KIAA0564 | G  | 0.850 | 0.022                  | 0.004  | 9.10×10 <sup>-10</sup>  | 0.010           | 0.010    | 0.320                  | 0.003                 | 0.005 | 0.516                  |
| Calcium | rs10491003  | 10  | GATA3         | T  | 0.090 | 0.027                  | 0.005  | 4.80×10 <sup>-9</sup>   | -0.008          | 0.013    | 0.550                  | 0.001                 | 0.007 | 0.943                  |
| 25OHD   | rs3755967   | 4   | GC            | C  | 0.720 | 0.089                  | 0.002  | 4.74×10 <sup>-343</sup> | -0.006          | 0.008    | 0.450                  | 0.001                 | 0.004 | 0.845                  |
| 25OHD   | rs12785878  | 11  | DHCR7         | T  | 0.750 | 0.036                  | 0.002  | 3.80×10 <sup>-62</sup>  | -0.018          | 0.009    | 0.034                  | 0.004                 | 0.004 | 0.323                  |
| 25OHD   | rs10741657  | 11  | CYP2R1        | A  | 0.400 | 0.031                  | 0.002  | 2.05×10 <sup>-46</sup>  | -0.015          | 0.008    | 0.047                  | 0.003                 | 0.004 | 0.375                  |
| 25OHD   | rs17216707  | 20  | CYP24A1       | T  | 0.790 | 0.026                  | 0.003  | 8.14×10 <sup>-23</sup>  | -0.018          | 0.010    | 0.067                  | 0.003                 | 0.005 | 0.552                  |
| 25OHD   | rs10745742  | 12  | AMDHD1        | T  | 0.400 | 0.017                  | 0.002  | 1.88×10 <sup>-14</sup>  | -0.016          | 0.008    | 0.039                  | -0.006                | 0.004 | 0.143                  |
| 25OHD   | rs8018720   | 14  | SEC23A        | G  | 0.180 | 0.017                  | 0.003  | 4.72×10 <sup>-9</sup>   | 0.001           | 0.010    | 0.940                  | -0.005                | 0.005 | 0.290                  |
| 25OHD   | rs117913124 | 11  | CYP2R1        | G  | 0.975 | 0.430††                | 0.020  | 1.50×10 <sup>-88</sup>  | -0.021          | 0.024    | 0.390                  | NA                    | NA    | NA                     |
| Traits  | SNP         | Chr | Nearby gene   | EA | EAF   | Fasting Insulin§       | HOMA-B |                         |                 | HOMA-IR# |                        |                       |       |                        |
| Calcium | rs1801725   | 3   | CASR          | T  | 0.150 | -0.001                 | 0.006  | 0.898                   | 0.002           | 0.005    | 0.674                  | -0.001                | 0.006 | 0.899                  |
| Calcium | rs1570669   | 20  | CYP24A1       | G  | 0.340 | -0.007                 | 0.004  | 0.070                   | -0.003          | 0.004    | 0.327                  | -0.006                | 0.004 | 0.129                  |
| Calcium | rs1550532   | 2   | DGKD          | C  | 0.310 | 0.011                  | 0.004  | 0.009                   | 0.006           | 0.004    | 0.109                  | 0.009                 | 0.004 | 0.043                  |
| Calcium | rs7481584   | 11  | CARS          | G  | 0.700 | 0.005                  | 0.004  | 0.255                   | 0.004           | 0.004    | 0.281                  | 0.005                 | 0.005 | 0.233                  |
| Calcium | rs780094    | 2   | GCKR**        | T  | 0.420 | -0.015                 | 0.004  | 9.77×10 <sup>-5</sup>   | -0.004          | 0.003    | 0.252                  | -0.020                | 0.004 | 7.63×10 <sup>-7</sup>  |
| Calcium | rs7336933   | 13  | DGKH/KIAA0564 | G  | 0.850 | 0.002                  | 0.005  | 0.654                   | -0.003          | 0.005    | 0.556                  | 0.003                 | 0.006 | 0.613                  |
| Calcium | rs10491003  | 10  | GATA3         | T  | 0.090 | -0.003                 | 0.007  | 0.668                   | 0.003           | 0.006    | 0.574                  | -0.002                | 0.007 | 0.747                  |
| 25OHD   | rs3755967   | 4   | GC            | C  | 0.720 | -0.005                 | 0.004  | 0.302                   | -0.006          | 0.004    | 0.122                  | -0.006                | 0.005 | 0.190                  |
| 25OHD   | rs12785878  | 11  | DHCR7         | T  | 0.750 | 0.007                  | 0.004  | 0.091                   | 0.004           | 0.004    | 0.224                  | 0.006                 | 0.004 | 0.168                  |
| 25OHD   | rs10741657  | 11  | CYP2R1        | A  | 0.400 | 0.006                  | 0.004  | 0.139                   | 0.003           | 0.003    | 0.391                  | 0.007                 | 0.004 | 0.079                  |
| 25OHD   | rs17216707  | 20  | CYP24A1       | T  | 0.790 | 0.007                  | 0.005  | 0.175                   | 0.005           | 0.005    | 0.257                  | 0.009                 | 0.006 | 0.089                  |
| 25OHD   | rs10745742  | 12  | AMDHD1        | T  | 0.400 | 0.001                  | 0.004  | 0.894                   | 0.004           | 0.003    | 0.299                  | 0.000                 | 0.004 | 0.950                  |
| 25OHD   | rs8018720   | 14  | SEC23A        | G  | 0.180 | -0.004                 | 0.005  | 0.398                   | -0.002          | 0.005    | 0.701                  | -0.006                | 0.005 | 0.262                  |
| 25OHD   | rs117913124 | 11  | CYP2R1        | G  | 0.975 | NA                     | NA     | NA                      | NA              | NA       | NA                     | NA                    | NA    | NA                     |

## SUPPLEMENTARY DATA

Chr indicates chromosome; EA, effect allele; EAF, effect allele frequency; HOMA-B and HOMA-IR, homeostatic model assessment for  $\beta$ -cell function and insulin resistance; SE, standard error; SNP, single-nucleotide polymorphisms; 25OHD, 25-hydroxyvitamin D.

\*The beta coefficients represent the change in serum levels of calcium (in mg/dL) and 25OHD (in ln-nmol/L for all SNPs but rs117913124, which is in SD units) for each additional effect allele.

†The beta coefficients represent the log odds ratio of type 2 diabetes for each additional effect allele.

‡The beta coefficients represent the change of level in mmol/l for each additional effect allele.

§The beta coefficients represent the change of natural log of level in pmol/l for each additional effect allele.

||The beta coefficients represent the change of natural log of score ( $\text{HOMA-B} = 20 \times \text{insulin} / (\text{glucose} - 3.5)$ ) for each additional effect allele.

#The beta coefficients represent the change of natural log of score in  $\text{pmol/l} \times \text{mmol/L}$  ( $\text{HOMA-IR} = \text{glucose} \times \text{insulin} / 22.5$ ) for each additional effect allele.

\*\*SNPs in GCKR gene were excluded from all analyses due to multiple pleiotropic associations with potential confounders.

††The beta coefficient represents the change in standard deviations of the standardized ln-transformed serum 25OHD levels.

SUPPLEMENTARY DATA

**Supplementary Table 3.** Characteristics of the single-nucleotide polymorphisms associated with serum parathyroid hormone levels and their associations with type 2 diabetes

| Traits | SNP        | Chr | Nearby gene | EA | S-PTH |       |       |                        | Type 2 diabetes |       |       |
|--------|------------|-----|-------------|----|-------|-------|-------|------------------------|-----------------|-------|-------|
|        |            |     |             |    | EAF   | beta* | se    | P                      | beta†           | se    | P     |
| S-PTH  | rs6127099  | 20  | CYP24A1     | T  | 0.34  | 0.07  | 0.003 | $2.40 \times 10^{-72}$ | 0.017           | 0.009 | 0.044 |
| S-PTH  | rs4074995  | 5   | RGS14       | G  | 0.71  | 0.03  | 0.003 | $3.30 \times 10^{-23}$ | -0.018          | 0.008 | 0.029 |
| S-PTH  | rs219779   | 21  | CLDN14      | G  | 0.75  | 0.04  | 0.003 | $8.90 \times 10^{-22}$ | -0.010          | 0.009 | 0.230 |
| S-PTH  | rs4443100  | 22  | RTDR1       | G  | 0.32  | 0.02  | 0.003 | $4.10 \times 10^{-11}$ | 0.002           | 0.008 | 0.810 |
| S-PTH  | rs73186030 | 3   | CASR        | T  | 0.14  | 0.03  | 0.004 | $1.20 \times 10^{-9}$  | 0.030           | 0.011 | 0.006 |

Chr indicates chromosome; EA, effect allele; EAF, effect allele frequency; SE, standard error; SNP, single-nucleotide polymorphisms; S-PTH, serum parathyroid hormone.

\*The beta coefficients represent the change in serum levels of parathyroid hormone (in pg/mL) for each additional effect allele.

†The beta coefficients represent the log odds ratio of type 2 diabetes for each additional effect allele.

SUPPLEMENTARY DATA

**Supplementary Table 4.** Related traits of the single-nucleotide polymorphisms associated with serum 25-hydroxyvitamin D from PhenoScanner V2

| SNPs        | EA | Nearby gene    | Function   | Related traits                        | Beta  | P                      | Related traits                             | Beta   | P                      | Related traits                   | Beta  | P                      |
|-------------|----|----------------|------------|---------------------------------------|-------|------------------------|--------------------------------------------|--------|------------------------|----------------------------------|-------|------------------------|
| rs3755967   | C  | <i>GC</i>      | Transport  | White blood cell count                | 0.026 | $3.61 \times 10^{-11}$ | Myeloid white cell count                   | 0.026  | $8.05 \times 10^{-11}$ | Sum basophil neutrophil counts   | 0.025 | $1.85 \times 10^{-10}$ |
| rs12785878  | T  | <i>DHCR7</i>   | Synthesis  | NA                                    | NA    | NA                     | NA                                         | NA     | NA                     | NA                               | NA    | NA                     |
| rs10741657  | A  | <i>CYP2R1</i>  | Synthesis  | Height                                | 0.010 | $2.30 \times 10^{-8}$  | Hip circumference                          | 0.011  | $3.22 \times 10^{-6}$  | Leg fat-free mass right          | 0.007 | $5.84 \times 10^{-6}$  |
| rs17216707  | T  | <i>CYP24A1</i> | Catabolism | Glomerular filtration rate creatinine | 0.008 | $9.00 \times 10^{-15}$ | log eGFR creatinine                        | -0.008 | $6.00 \times 10^{-13}$ | Glomerular filtration rate       | 0.761 | $6.00 \times 10^{-7}$  |
| rs10745742  | T  | <i>AMDHD1</i>  | Catabolism | NA                                    | NA    | NA                     | NA                                         | NA     | NA                     | NA                               | NA    | NA                     |
| rs8018720   | G  | <i>SEC23A</i>  | Transport  | NA                                    | NA    | NA                     | NA                                         | NA     | NA                     | NA                               | NA    | NA                     |
| rs117913124 | G  | <i>CYP2R1</i>  | Synthesis  | NA                                    | NA    | NA                     | NA                                         | NA     | NA                     | NA                               | NA    | NA                     |
| SNPs        | EA | Nearby gene    | Function   | Related traits                        | Beta  | P                      | Related traits                             | Beta   | P                      | Related traits                   | Beta  | P                      |
| rs3755967   | C  | <i>GC</i>      | Transport  | Granulocyte count                     | 0.025 | $2.32 \times 10^{-10}$ | Neutrophil count                           | 0.025  | $3.22 \times 10^{-10}$ | Sum neutrophil eosinophil counts | 0.025 | $3.26 \times 10^{-10}$ |
| rs12785878  | T  | <i>DHCR7</i>   | Synthesis  | NA                                    | NA    | NA                     | NA                                         | NA     | NA                     | NA                               | NA    | NA                     |
| rs10741657  | A  | <i>CYP2R1</i>  | Synthesis  | Leg predicted mass right              | 0.007 | $7.57 \times 10^{-6}$  | Leg predicted mass left                    | 0.007  | $9.08 \times 10^{-6}$  | NA                               | NA    | NA                     |
| rs17216707  | T  | <i>CYP24A1</i> | Catabolism | Calculus of kidney and ureter         | 0.001 | $4.55 \times 10^{-6}$  | Kidney stone or ureter stone/bladder stone | 0.001  | $8.00 \times 10^{-6}$  | Serum creatinine                 | NA    | $8.90 \times 10^{-6}$  |
| rs10745742  | T  | <i>AMDHD1</i>  | Catabolism | NA                                    | NA    | NA                     | NA                                         | NA     | NA                     | NA                               | NA    | NA                     |
| rs8018720   | G  | <i>SEC23A</i>  | Transport  | NA                                    | NA    | NA                     | NA                                         | NA     | NA                     | NA                               | NA    | NA                     |
| rs117913124 | G  | <i>CYP2R1</i>  | Synthesis  | NA                                    | NA    | NA                     | NA                                         | NA     | NA                     | NA                               | NA    | NA                     |

EA indicates effect allele; NA, not available; Web of PhenoScanner V2: <http://www.phenoscaner.medschl.cam.ac.uk/>



SUPPLEMENTARY DATA

**Supplementary Table 5.** Related traits of the single-nucleotide polymorphisms associated with serum calcium from PhenoScanner V2

| SNPs       | EA | Nearby gene          | Related traits                   | Beta     | P                      | Related traits           | Beta     | P                      | Related traits         | Beta  | P                     |
|------------|----|----------------------|----------------------------------|----------|------------------------|--------------------------|----------|------------------------|------------------------|-------|-----------------------|
| rs1801725  | T  | <i>CASR</i>          | Pulse rate                       | -0.02    | $2.56 \times 10^{-8}$  | Diastolic blood pressure | -0.02    | $1.50 \times 10^{-6}$  | NA                     | NA    | NA                    |
| rs1570669  | G  | <i>CYP24A1</i>       | NA                               | NA       | NA                     | NA                       | NA       | NA                     | NA                     | NA    | NA                    |
| rs1550532  | C  | <i>DGKD</i>          | Bilirubin levels                 | NA       | $3.00 \times 10^{-19}$ | Total serum bilirubin    | NA       | $3.08 \times 10^{-19}$ | NA                     | NA    | NA                    |
| rs7481584  | G  | <i>CARS</i>          | Sum basophil neutrophil counts   | -0.01966 | $7.27 \times 10^{-7}$  | Neutrophil count         | -0.01948 | $8.76 \times 10^{-7}$  | Granulocyte count      | -0.02 | $1.28 \times 10^{-6}$ |
| rs7336933  | G  | <i>DGKH/KIAA0564</i> | NA                               | NA       | NA                     | NA                       | NA       | NA                     | NA                     | NA    | NA                    |
| rs10491003 | T  | <i>GATA3</i>         | NA                               | NA       | NA                     | NA                       | NA       | NA                     | NA                     | NA    | NA                    |
| SNPs       | EA | Nearby gene          | Related traits                   | Beta     | P                      | Related traits           | Beta     | P                      | Related traits         | Beta  | P                     |
| rs1801725  | T  | <i>CASR</i>          | NA                               | NA       | NA                     | NA                       | NA       | NA                     | NA                     | NA    | NA                    |
| rs1570669  | G  | <i>CYP24A1</i>       | NA                               | NA       | NA                     | NA                       | NA       | NA                     | NA                     | NA    | NA                    |
| rs1550532  | C  | <i>DGKD</i>          | NA                               | NA       | NA                     | NA                       | NA       | NA                     | NA                     | NA    | NA                    |
| rs7481584  | G  | <i>CARS</i>          | Sum neutrophil eosinophil counts | -0.02    | $1.68 \times 10^{-6}$  | Myeloid white cell count | -0.02    | $2.21 \times 10^{-6}$  | White blood cell count | -0.02 | $8.20 \times 10^{-6}$ |
| rs7336933  | G  | <i>DGKH/KIAA0564</i> | NA                               | NA       | NA                     | NA                       | NA       | NA                     | NA                     | NA    | NA                    |
| rs10491003 | T  | <i>GATA3</i>         | NA                               | NA       | NA                     | NA                       | NA       | NA                     | NA                     | NA    | NA                    |

EA indicates effect allele; NA, not available; Web of PhenoScanner V2: <http://www.phenoscanter.medschl.cam.ac.uk/>

## SUPPLEMENTARY DATA

**Supplementary Figure 1.** Schematic diagram of the Mendelian randomization assumptions underpinning a Mendelian randomization analysis of the association between S-25OHD, S-Ca, S-PTH levels and type 2 diabetes and glycemic traits.

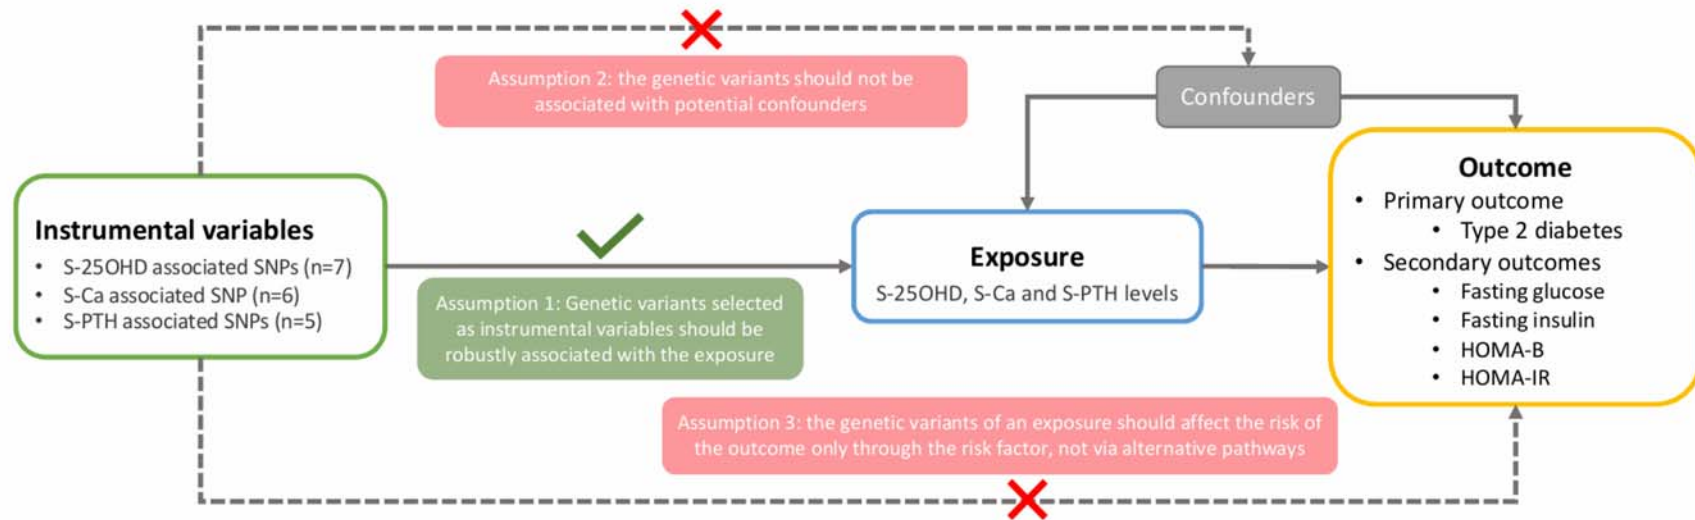

HOMA-B indicates homeostatic model assessment of beta-cell; HOMA-IR, homeostatic model assessment of insulin resistance; S-25OHD, serum 25-hydroxyvitamin D; S-Ca, serum calcium; S-PTH, serum parathyroid hormone.



SUPPLEMENTARY DATA

**Supplementary Figure 2.** Associations between serum 25OHD and the risk of type 2 diabetes based on body mass index unadjusted data in Mendelian Randomization analyses

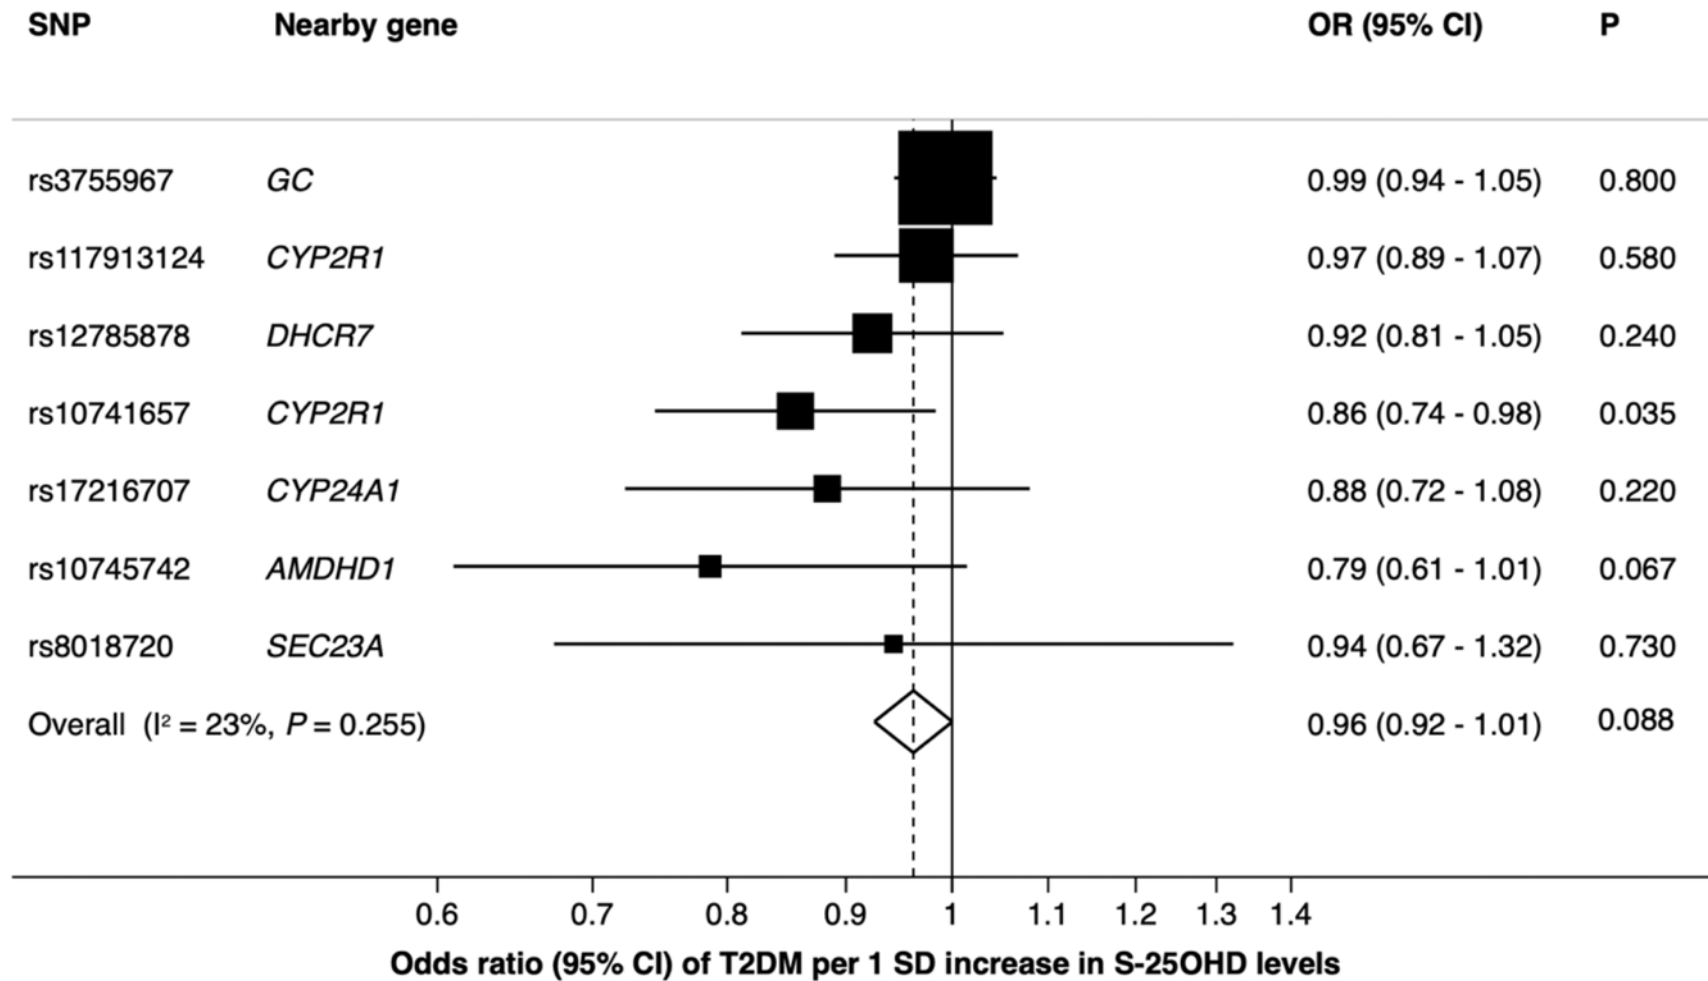

CI indicates confidence interval; OR, odds ratio; SNP, single-nucleotide polymorphisms; S-25OHD, serum 25-hydroxyvitamin D.

# SUPPLEMENTARY DATA

**Supplementary Figure 3.** Associations between serum 25OHD level and changes of glycemic traits from Mendelian Randomization Analyses

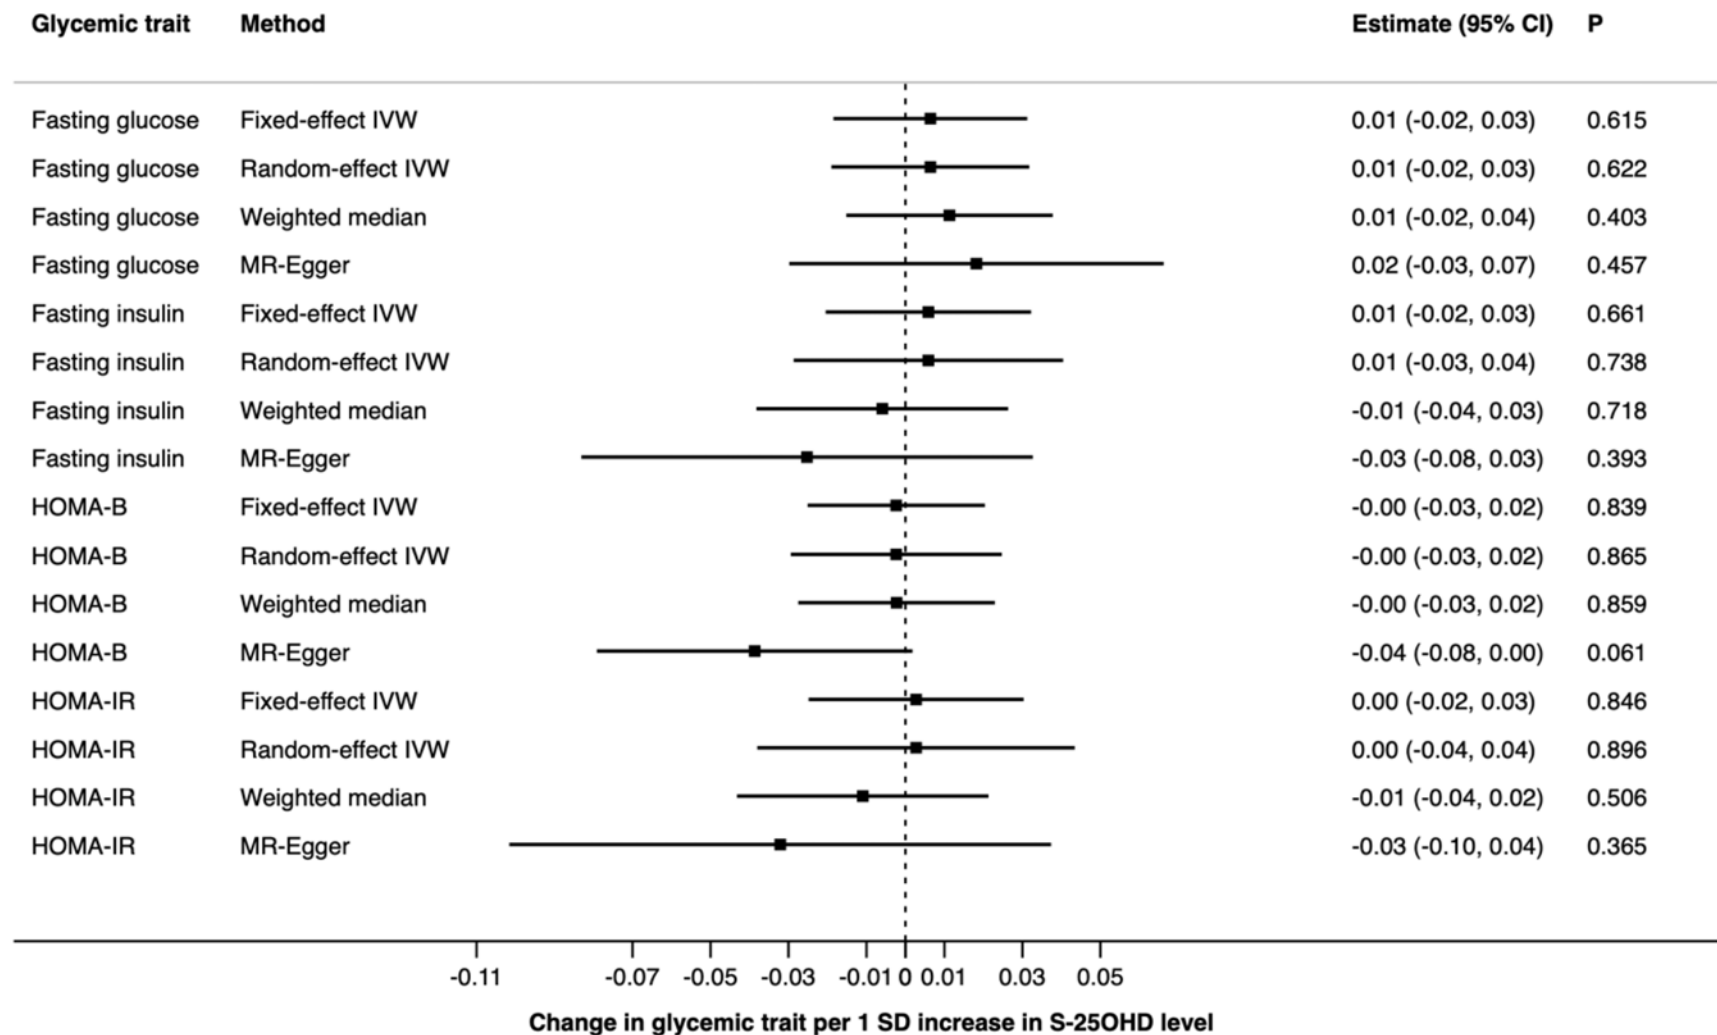

CI indicates confidence interval; HOMA-B, homeostatic model assessment for  $\beta$ -cell dysfunction; HOMA-IR, homeostatic model assessment for insulin resistance; IVW, inverse-variance weighted; MR-Egger, Mendelian randomization Egger regression; SD, standard deviation; S-25OHD, serum 25-hydroxyvitamin D;

SUPPLEMENTARY DATA

**Supplementary Figure 4.** Associations between serum calcium level and changes of glycemic traits in Mendelian Randomization Analyses

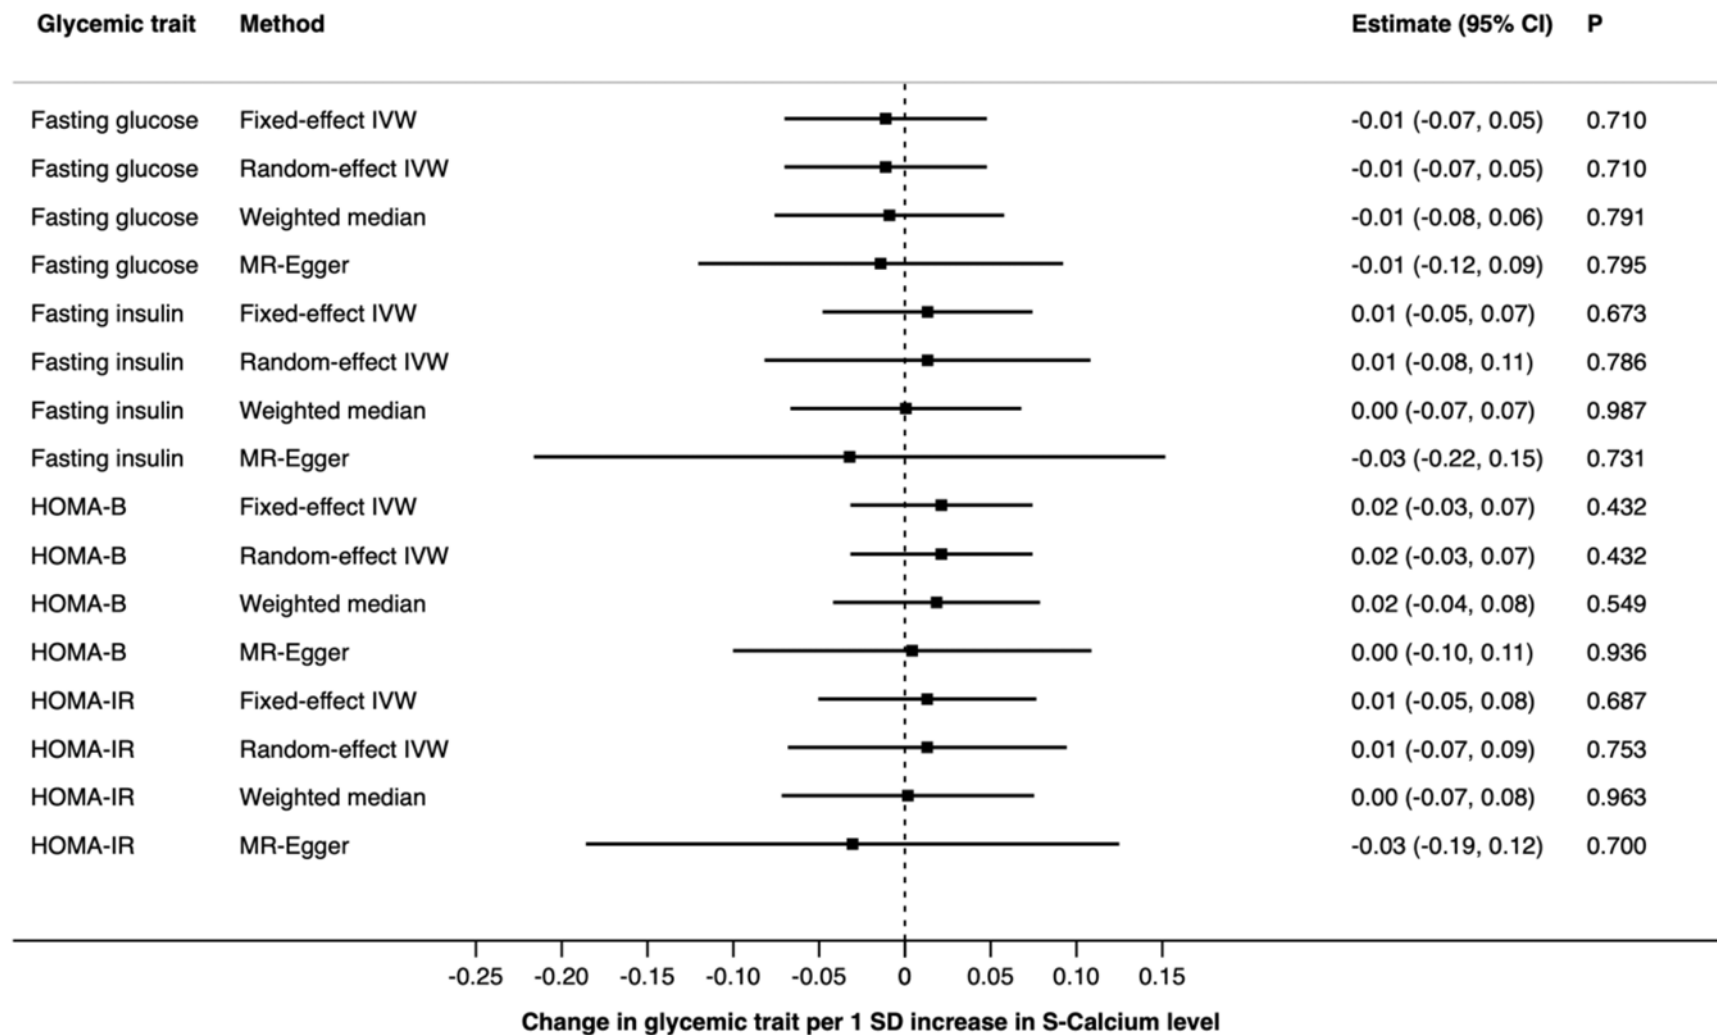

CI indicates confidence interval; HOMA-B, homeostatic model assessment for  $\beta$ -cell dysfunction; HOMA-IR, homeostatic model assessment for insulin resistance; IVW, inverse-variance weighted; MR-Egger, Mendelian randomization Egger regression; SD, standard deviation; S-Calcium, serum calcium;
